# Supplementary material
Source: publisher figshare collection journal article supplement (https://gsapubs.figshare.com/ndownloader/files/22409883)

R33 (secondary standard)

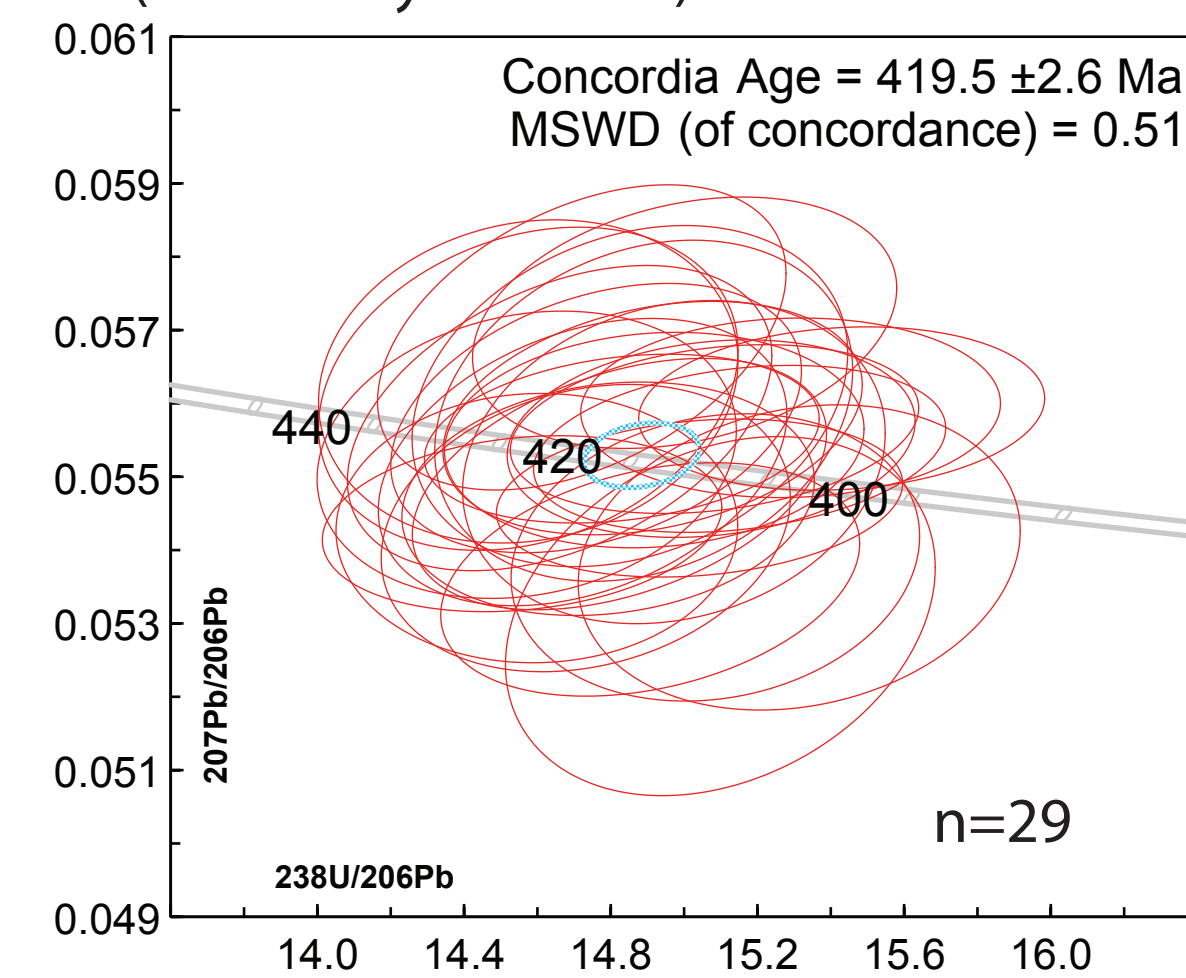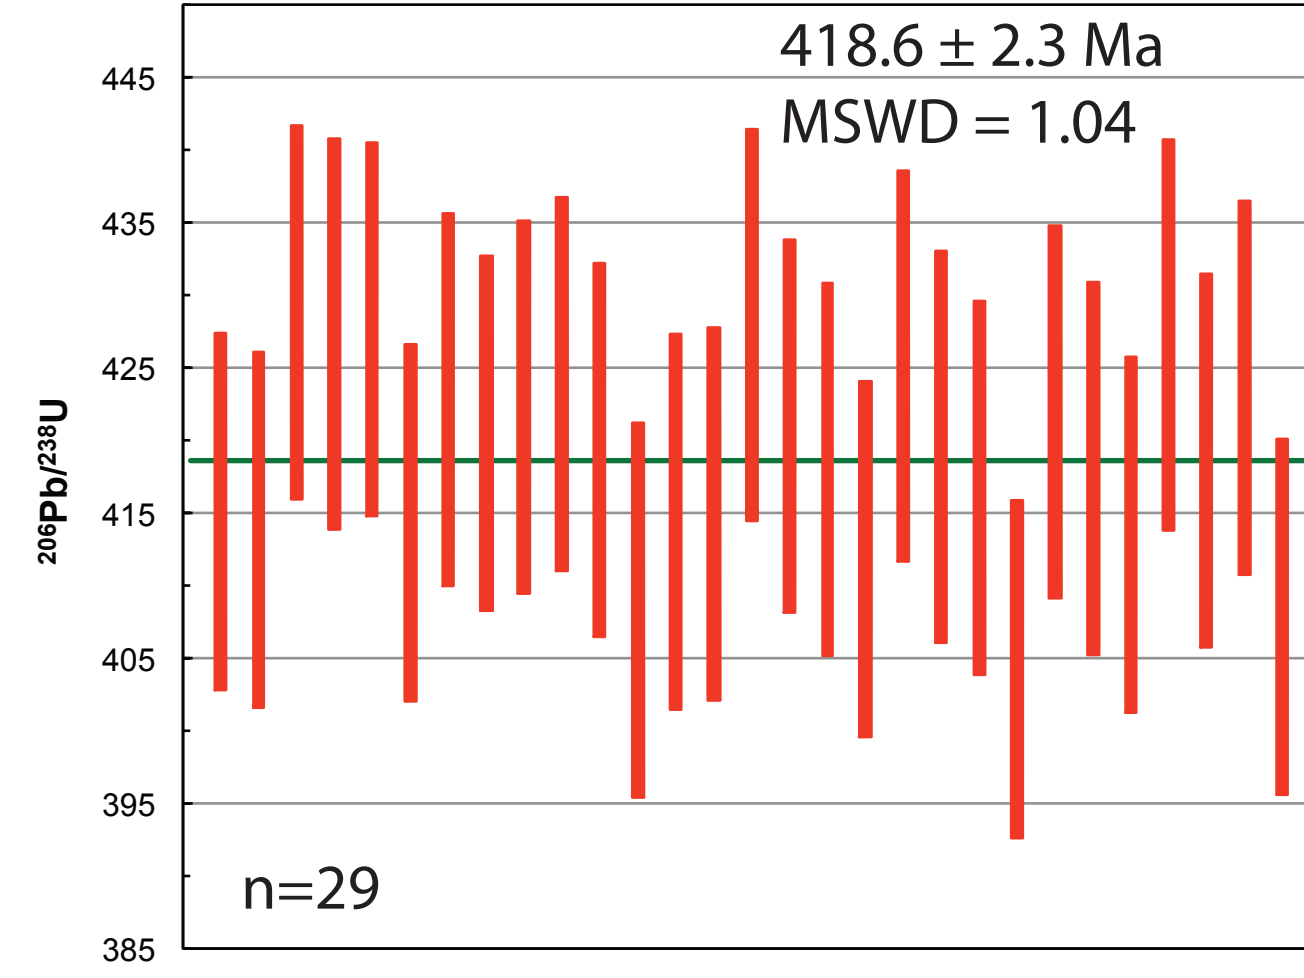

RBEP-005 (Heiney Bar)

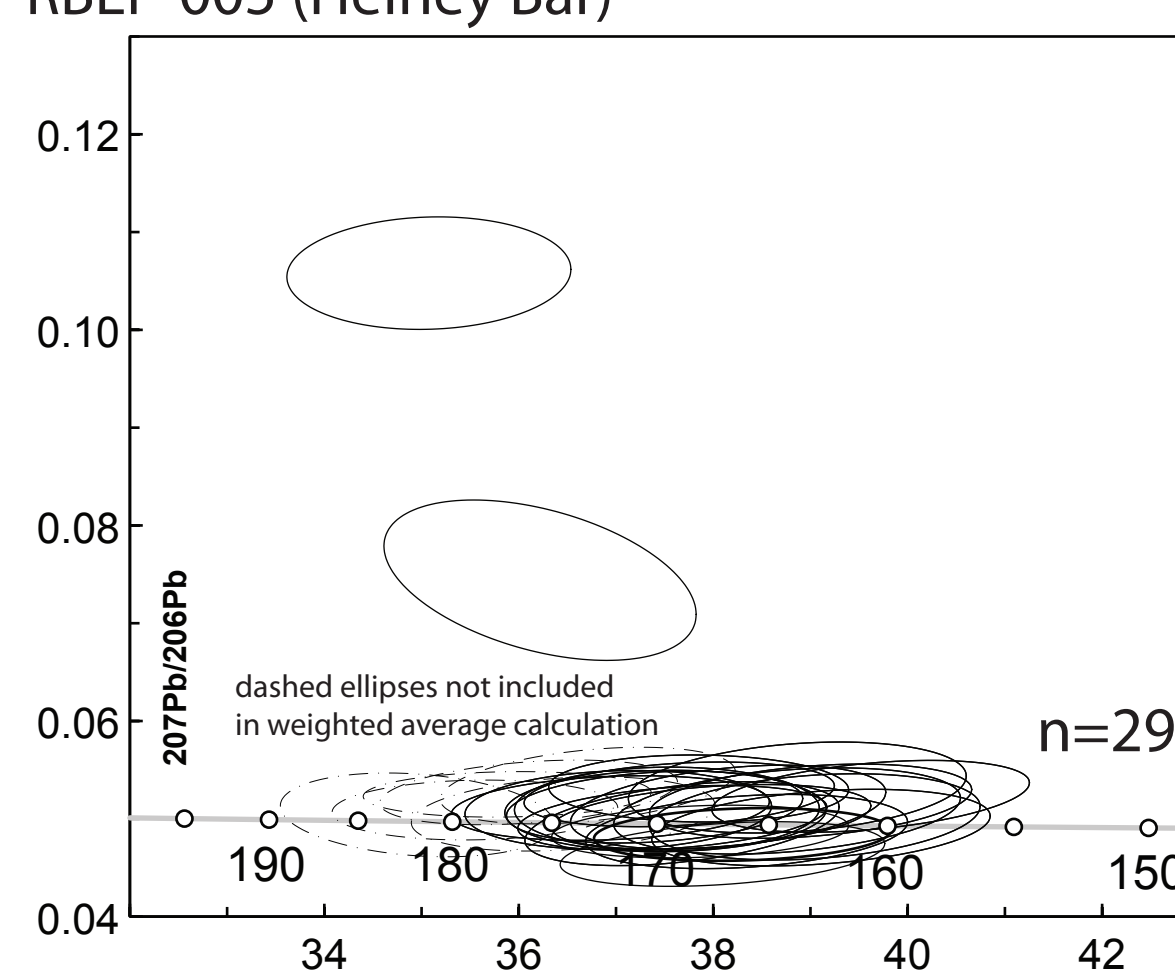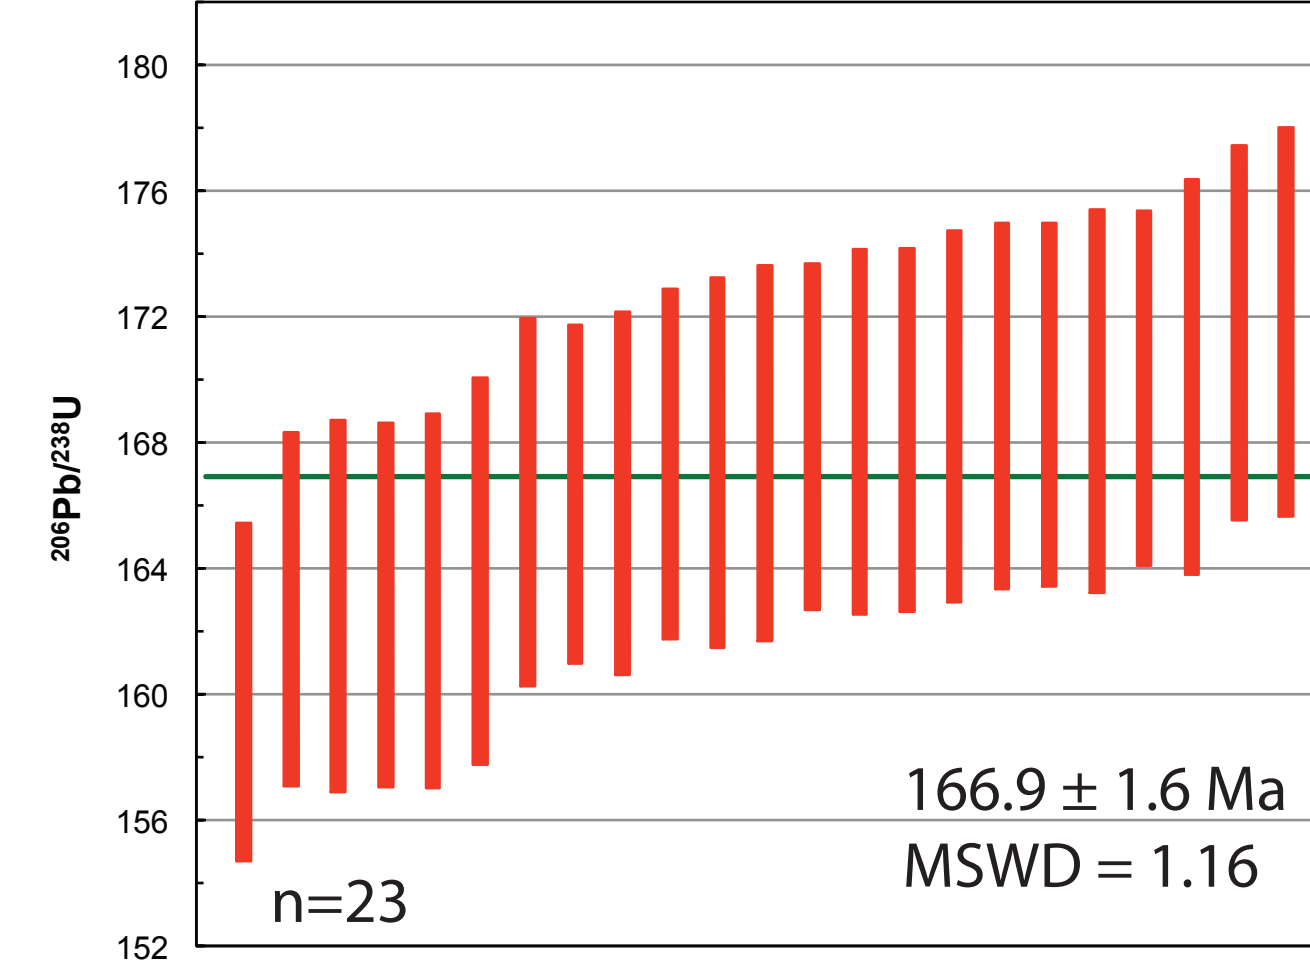

180M (Uncles Creek)

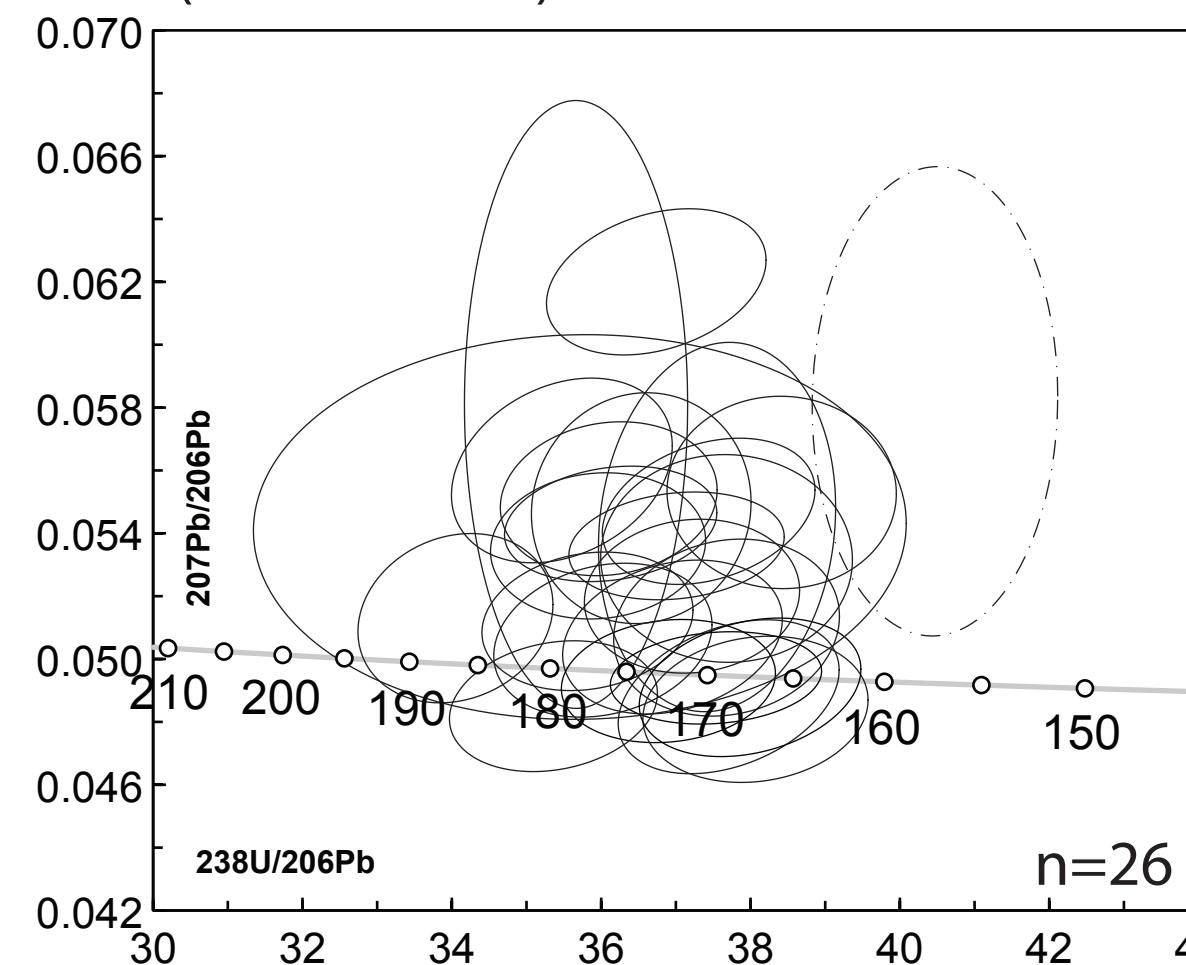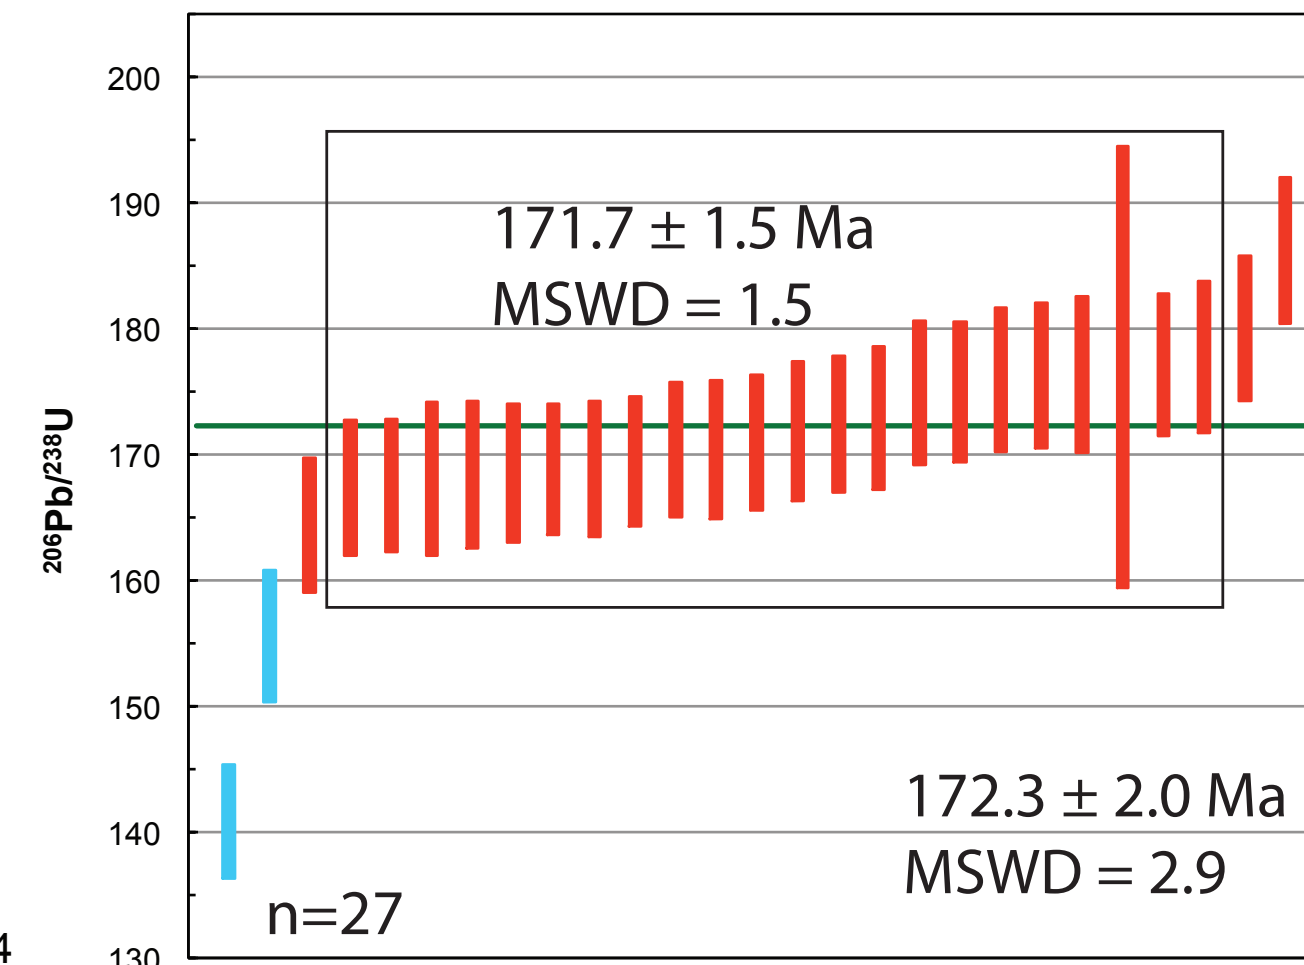

RBEP-010 (early stage EP)

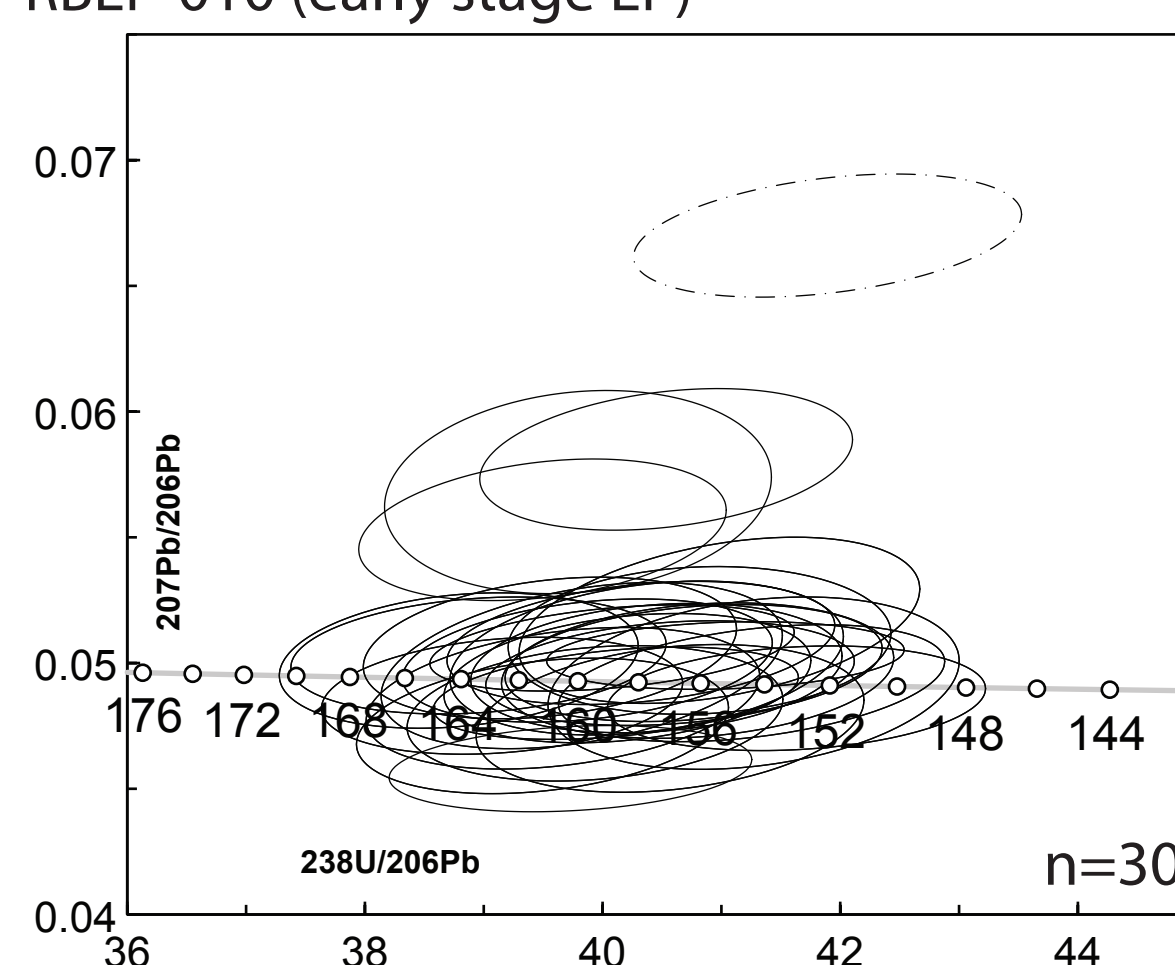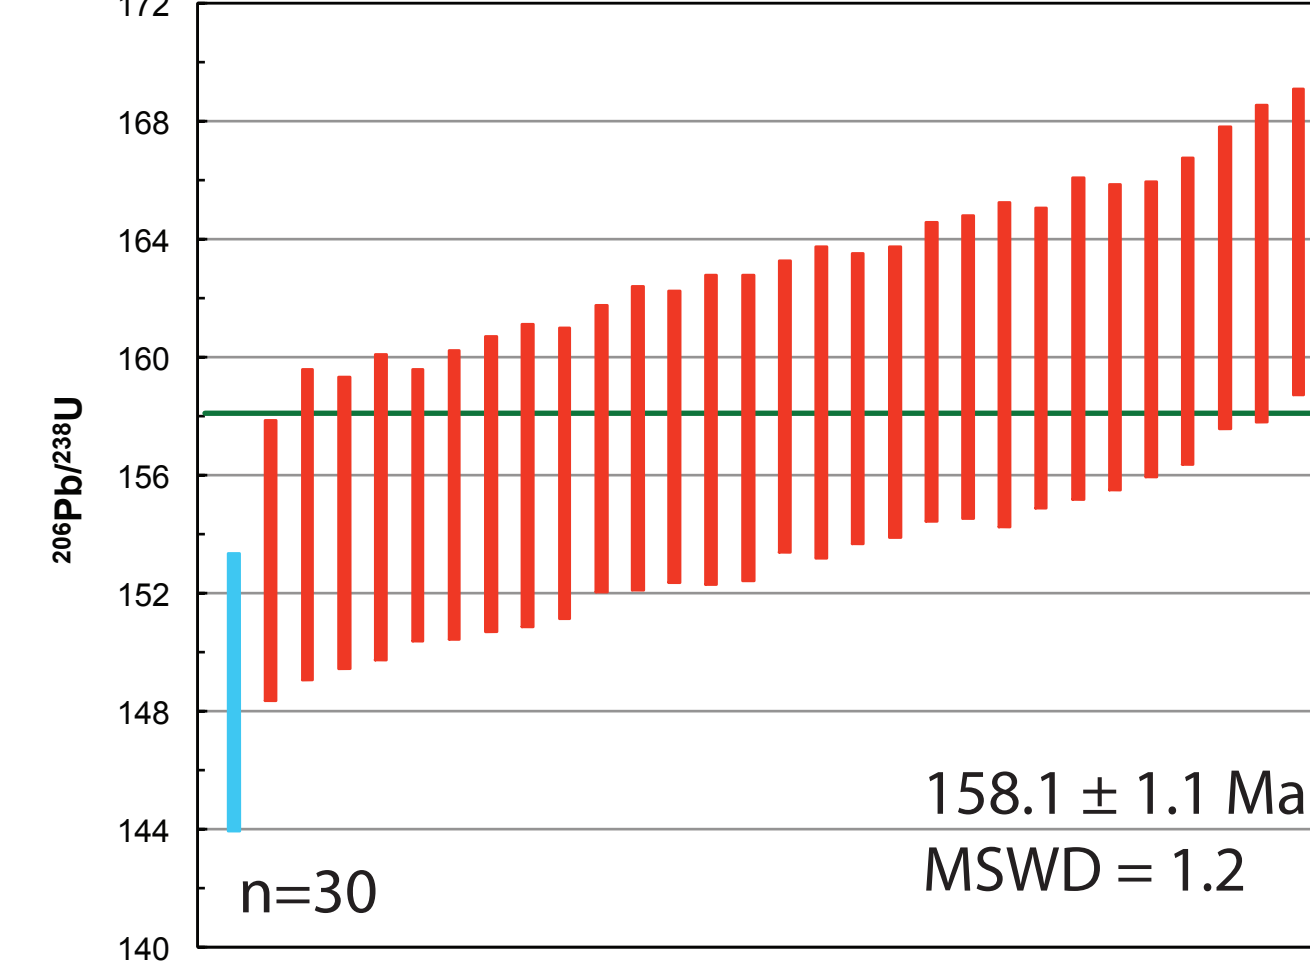

687M (early stage EP)

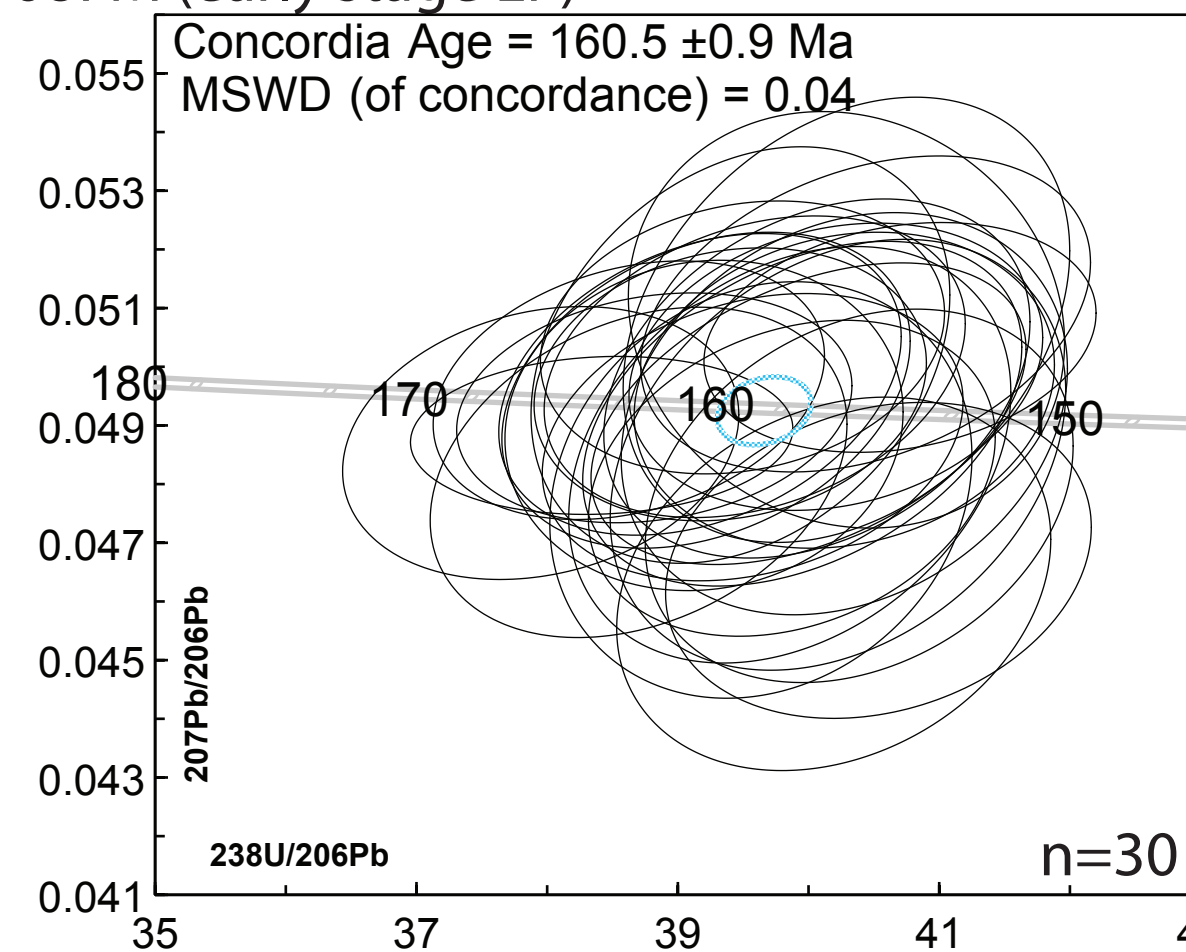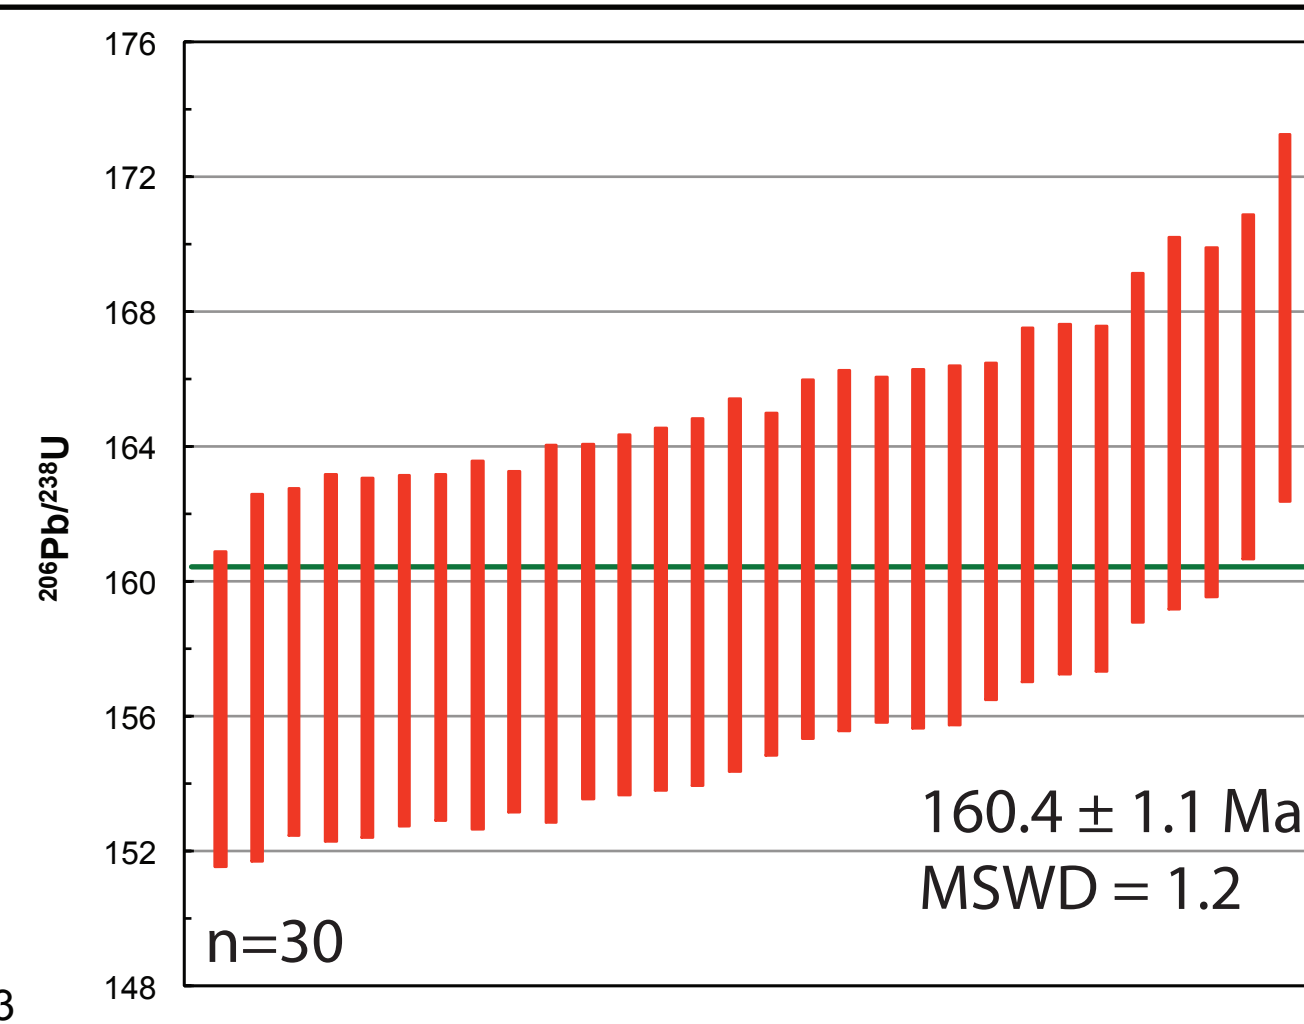

RBEP-011 (early stage EP)

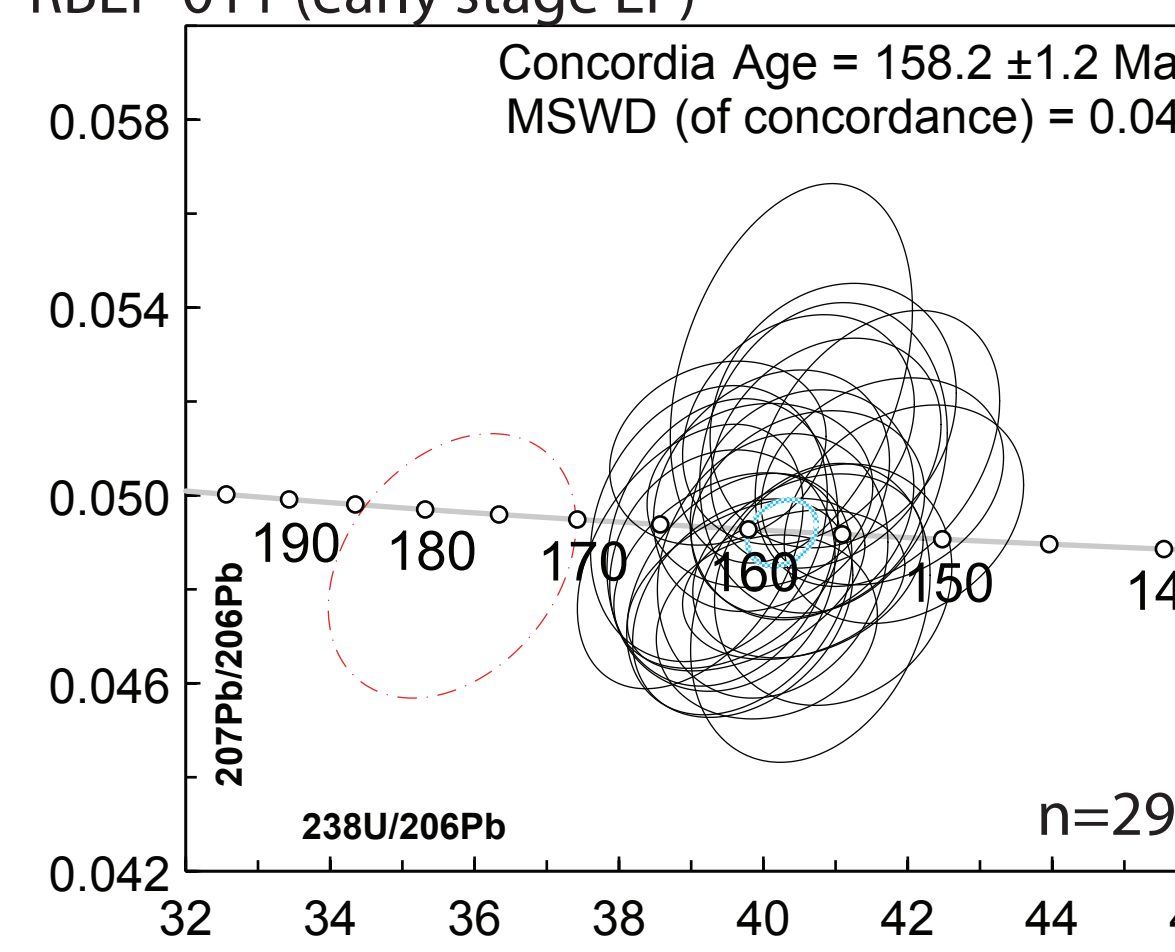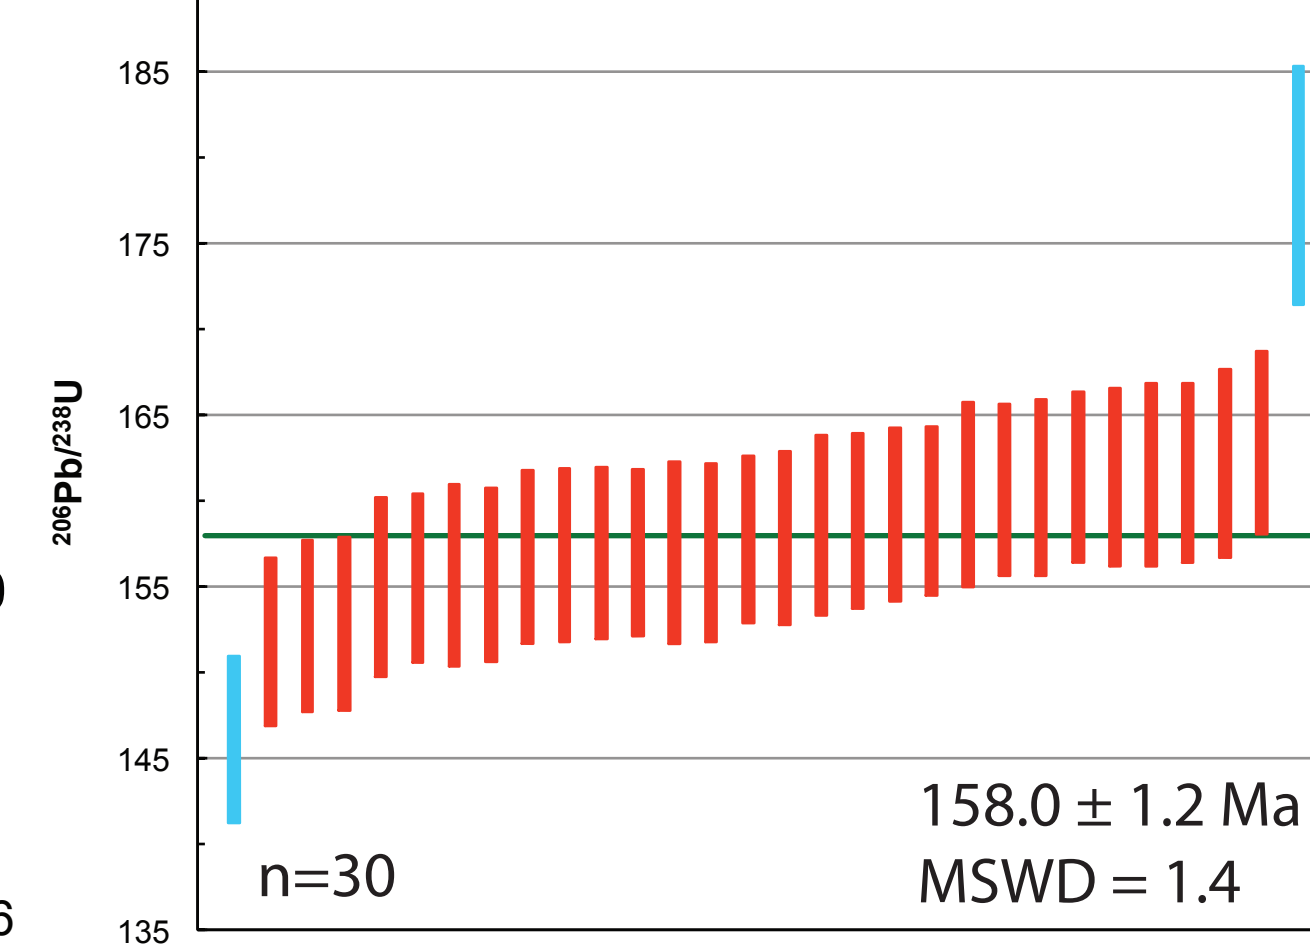

906M (Yellowjacket Ridge late stage)

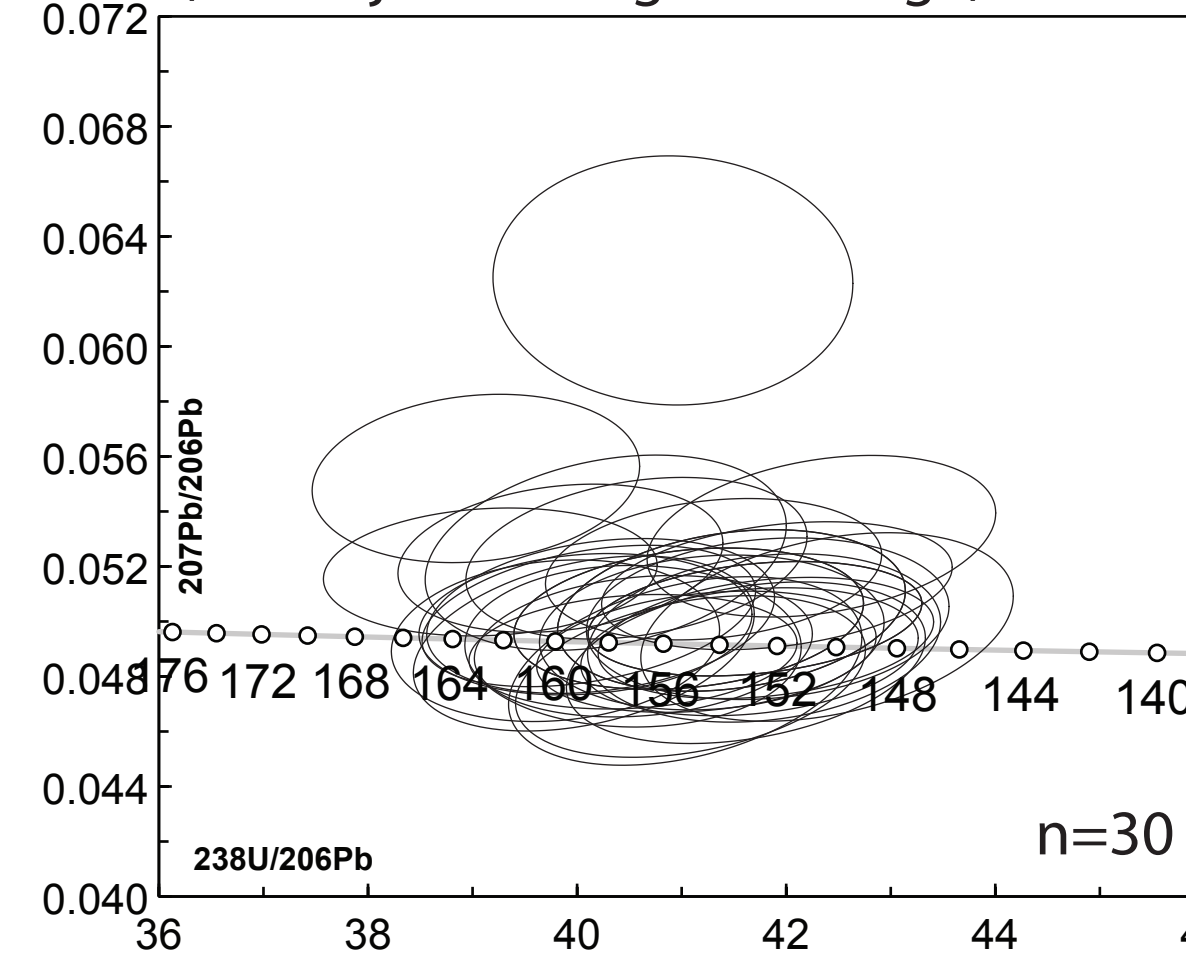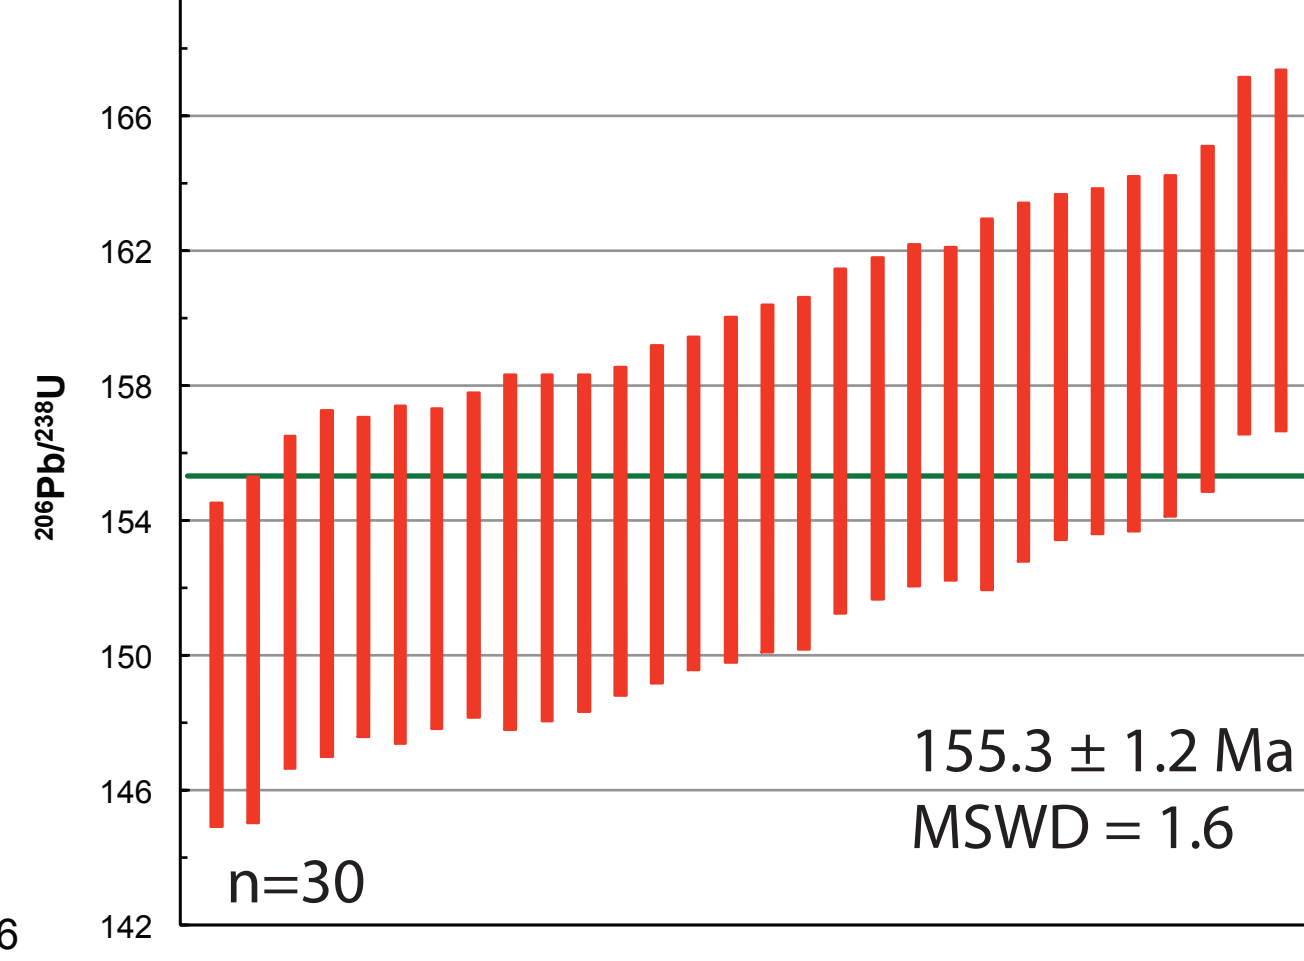

RBEP-022 (Chimney Rock late stage)

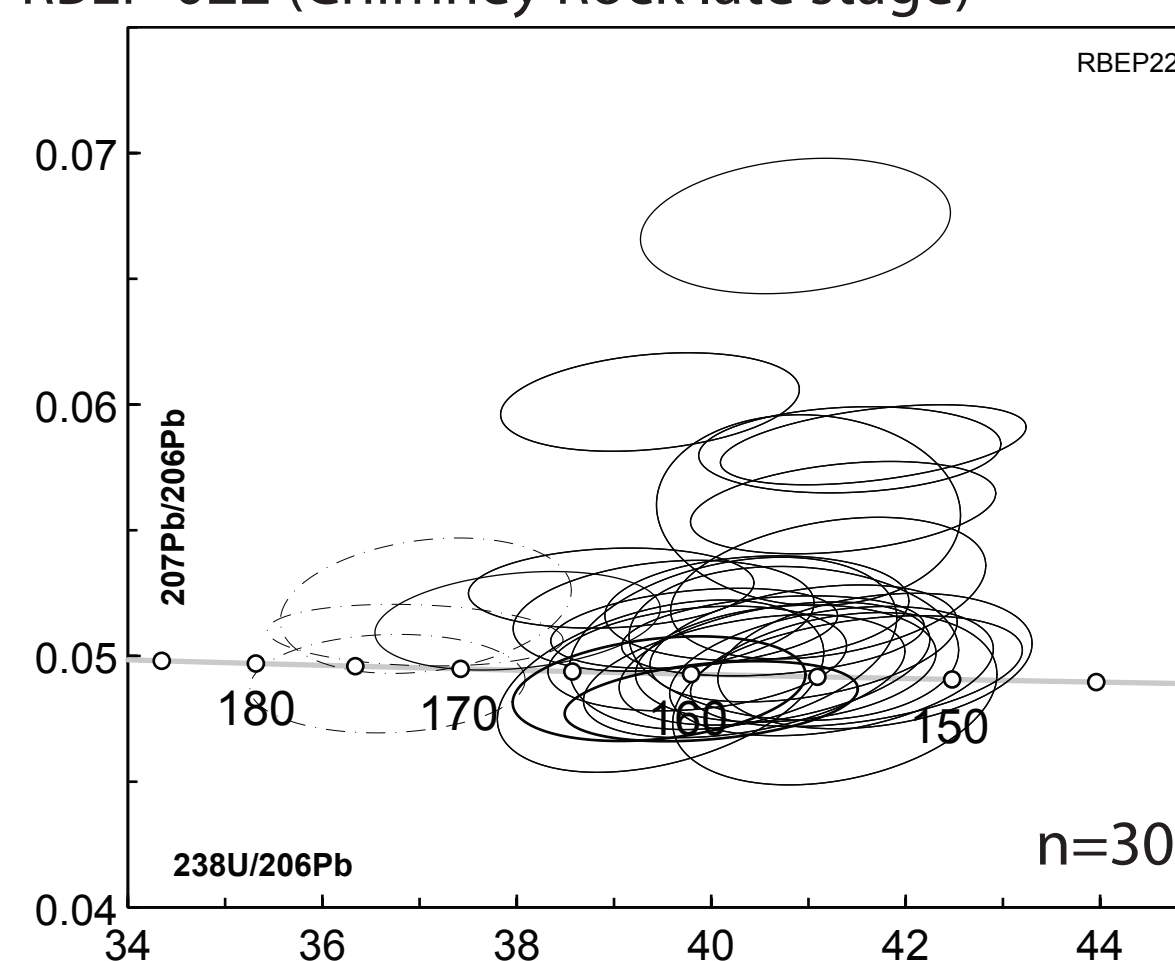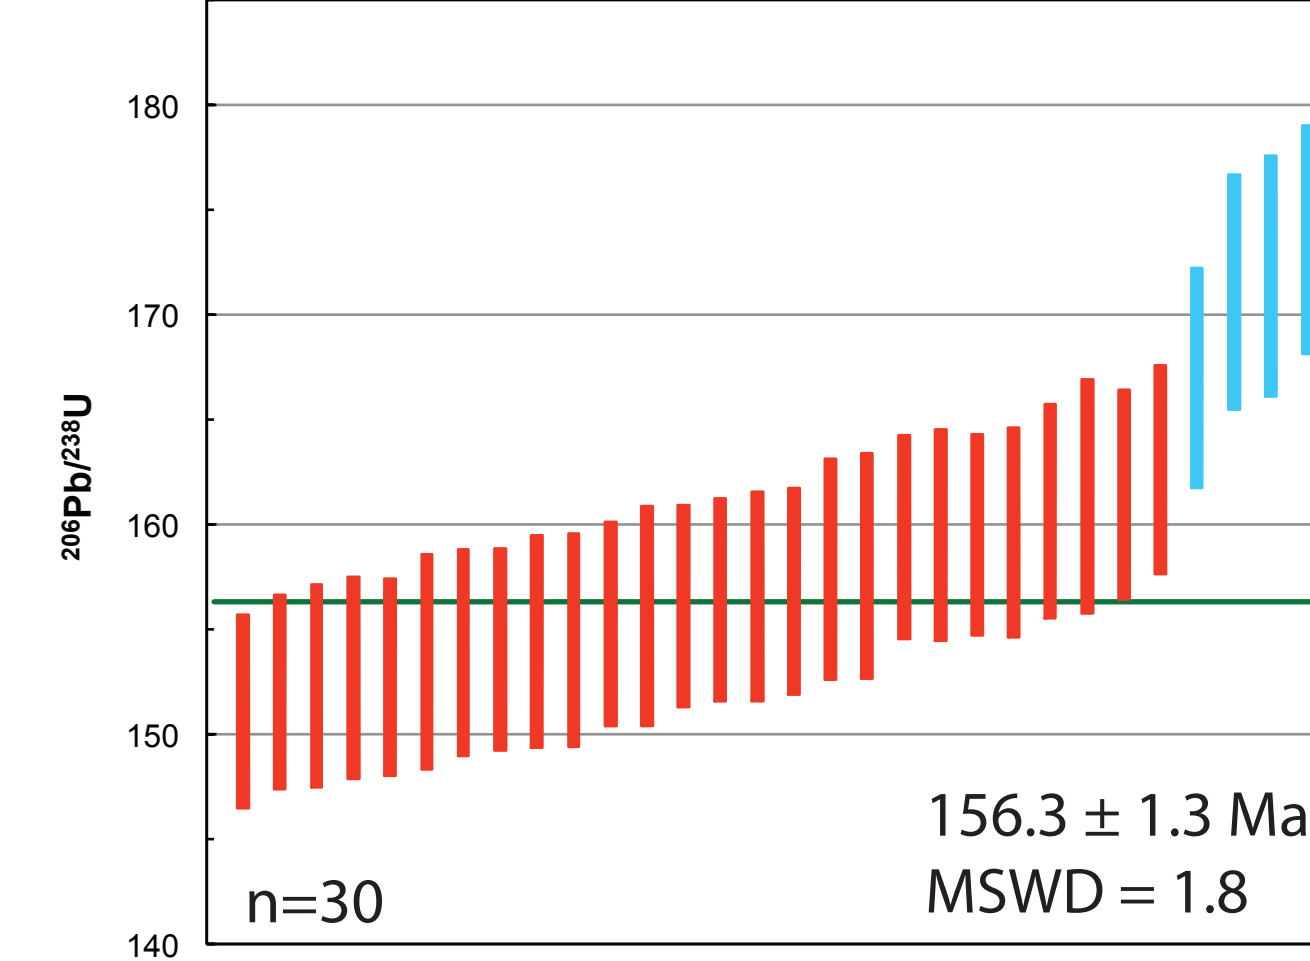

Supplement: Supplementary file 1 [file 22409883]
