# Supplementary material
Source: publisher figshare collection journal article supplement (https://gsapubs.figshare.com/ndownloader/files/22409883)

B 687M

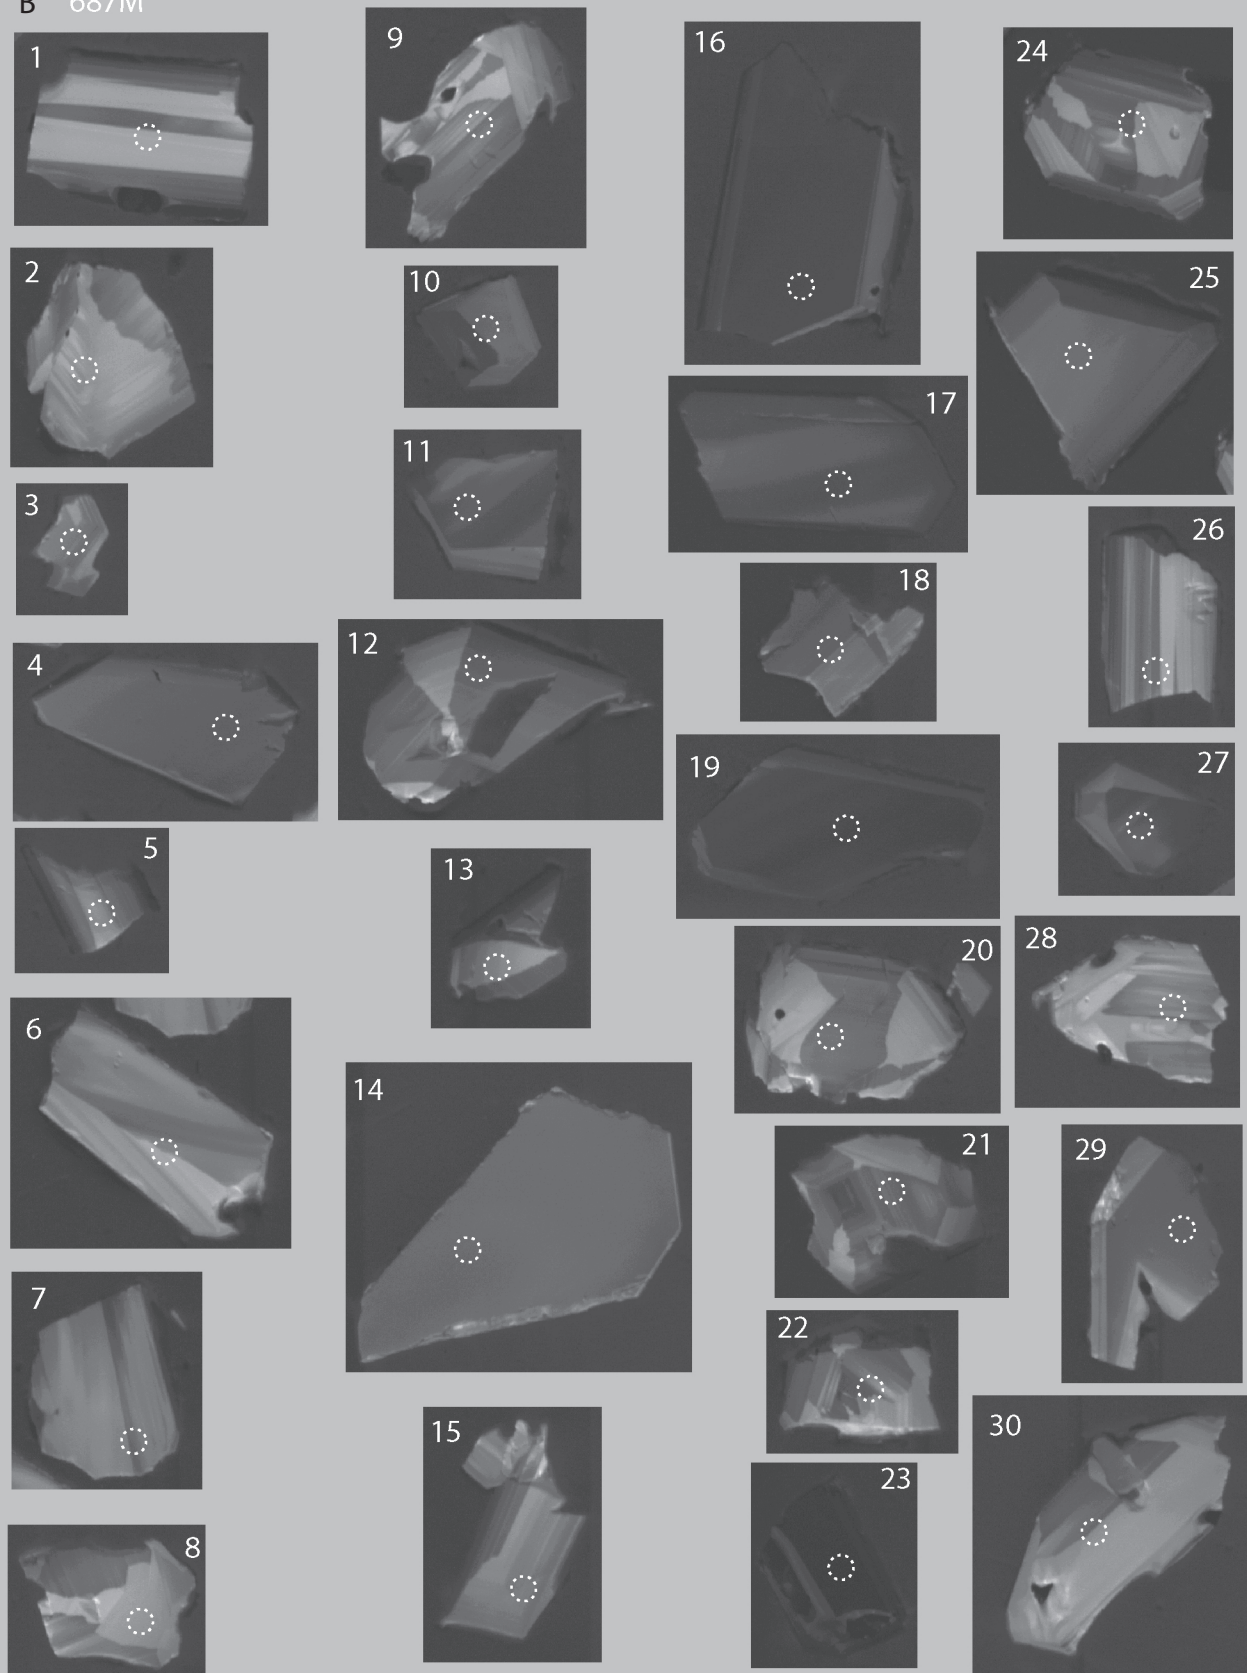

Supplement: Supplementary file 2 [file 22409883]

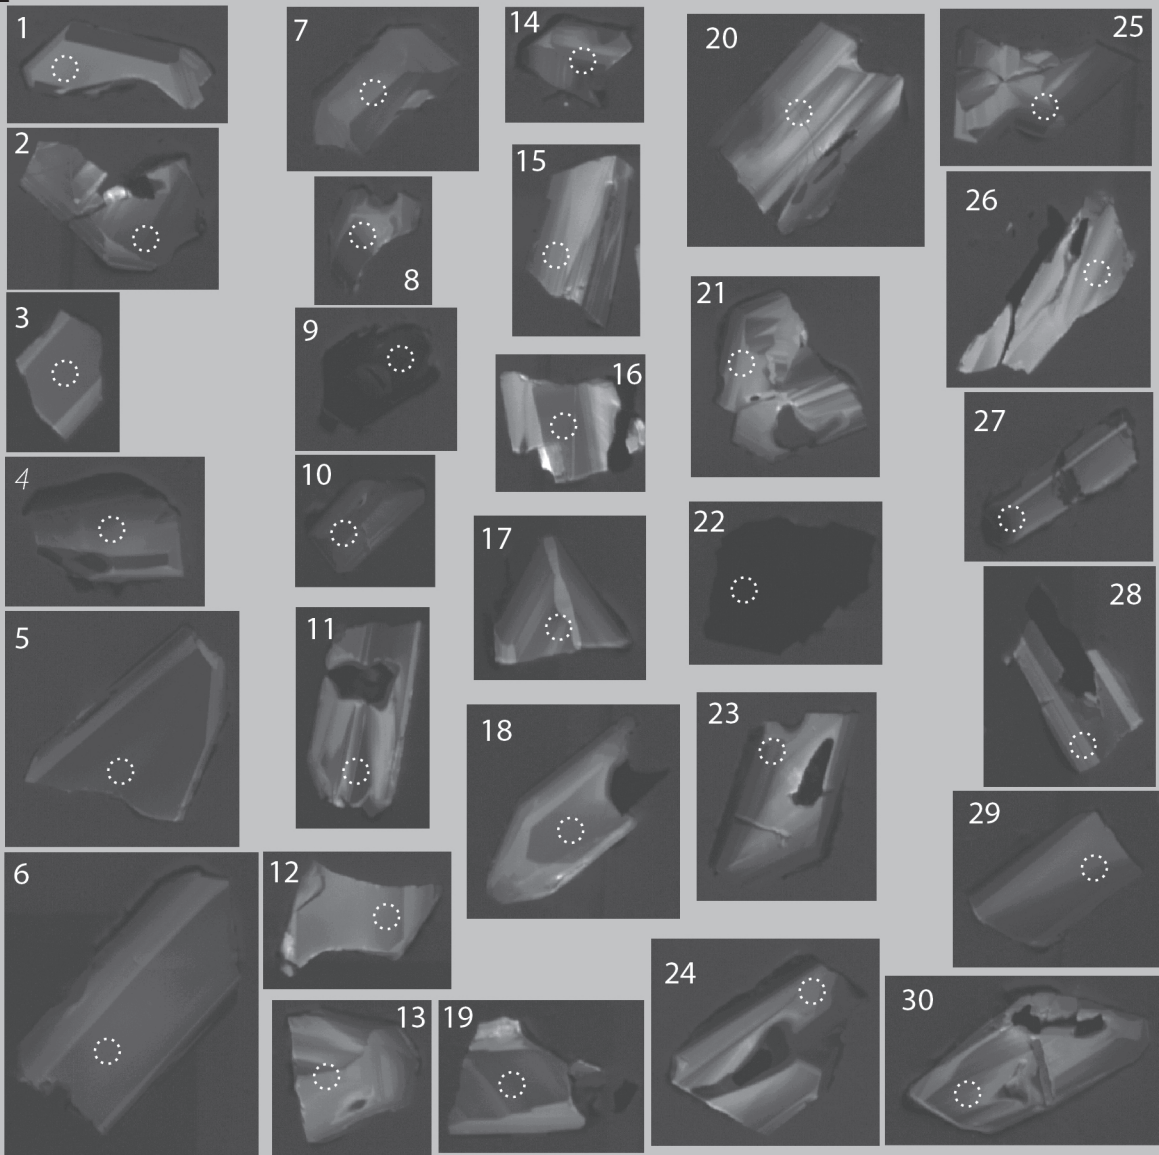

Supplement: Supplementary file 3 [file 22409883]

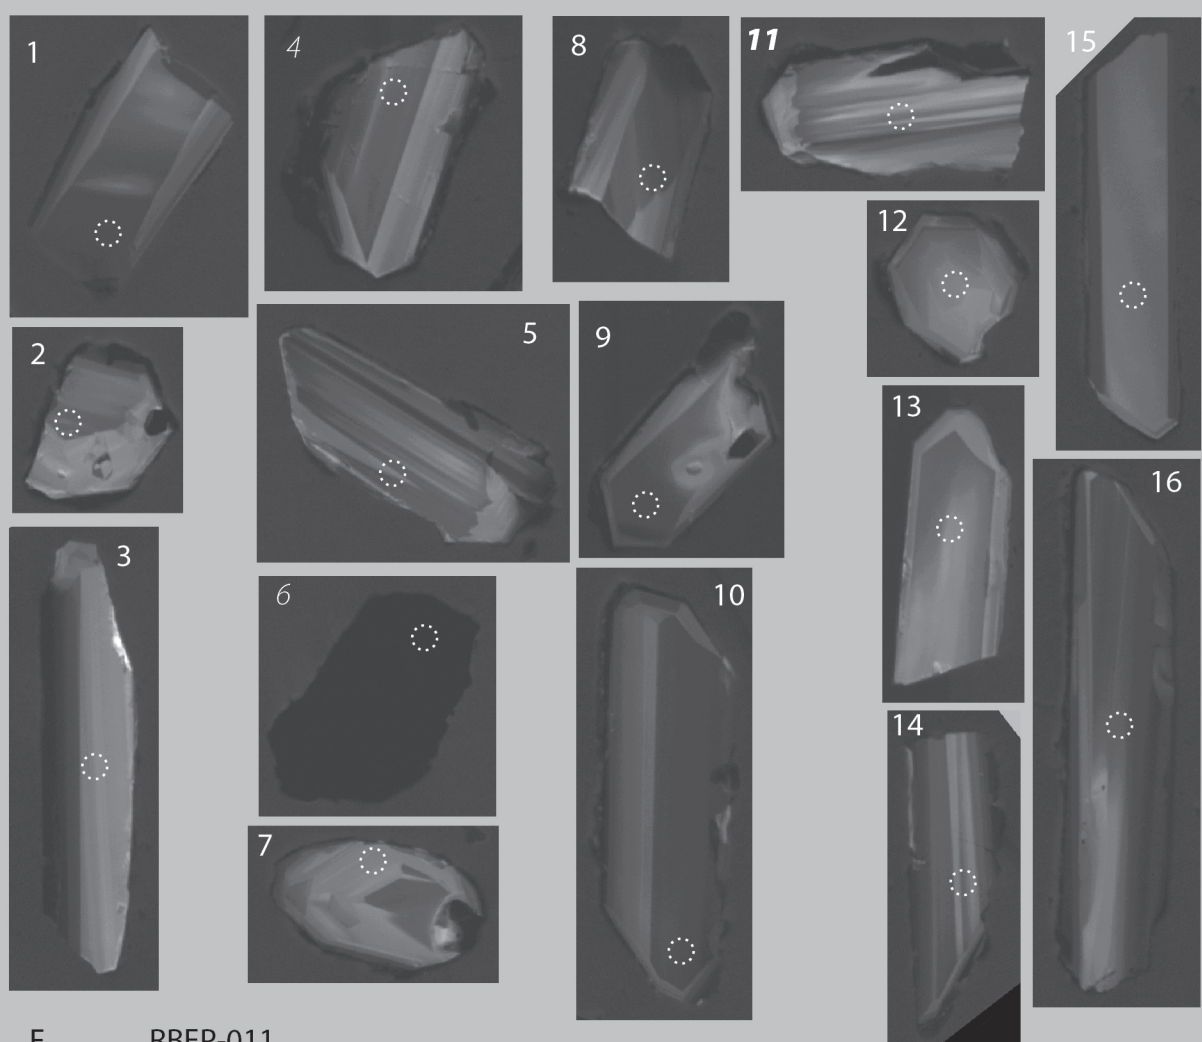

F RBEP-011

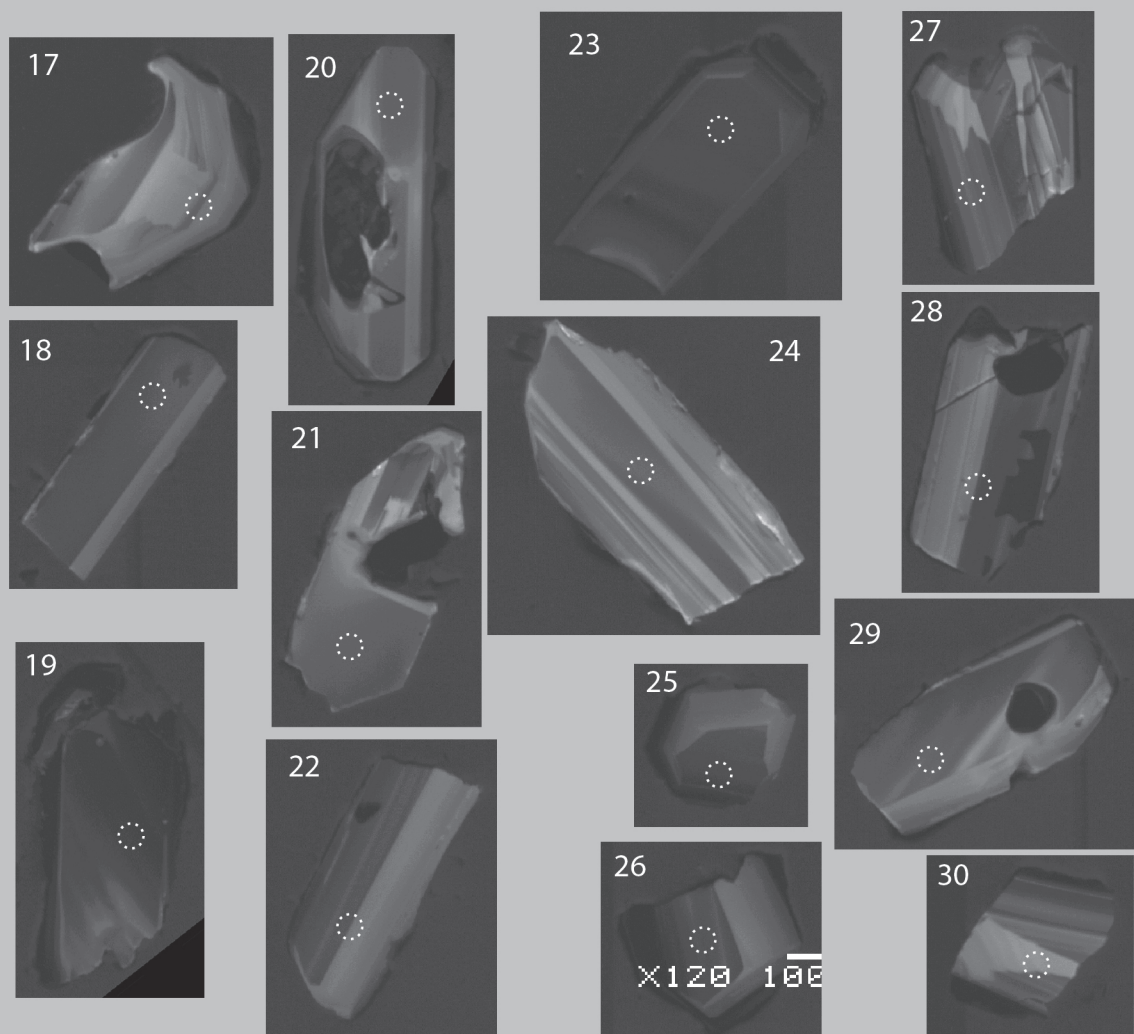

Supplement: Supplementary file 4 [file 22409883]

D RBEP-005

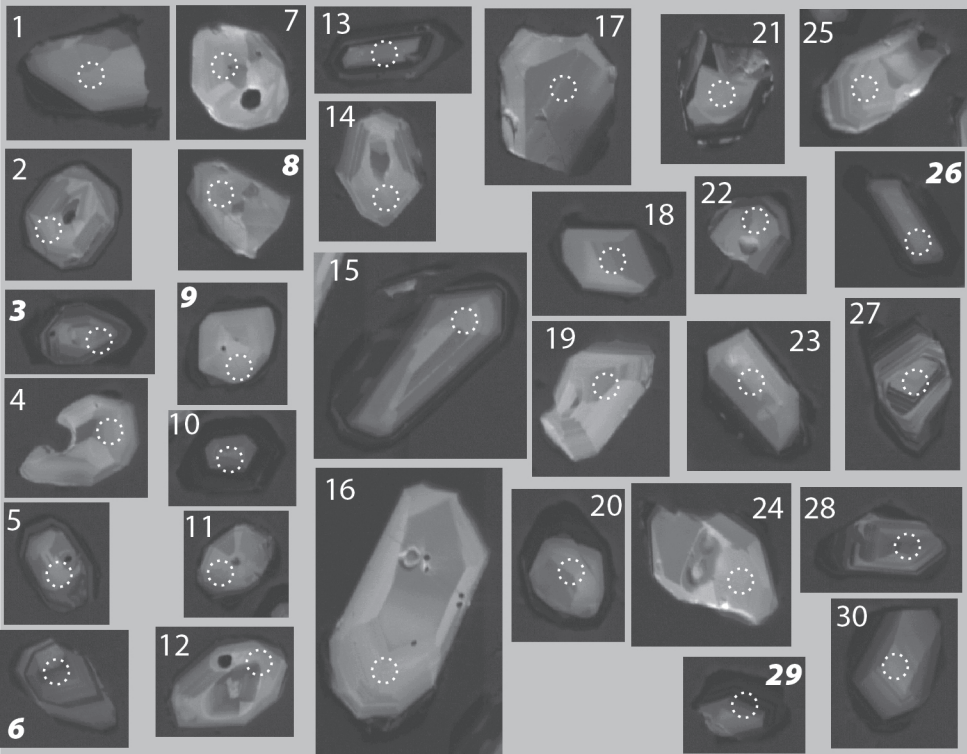

Supplement: Supplementary file 5 [file 22409883]

G RBEP022

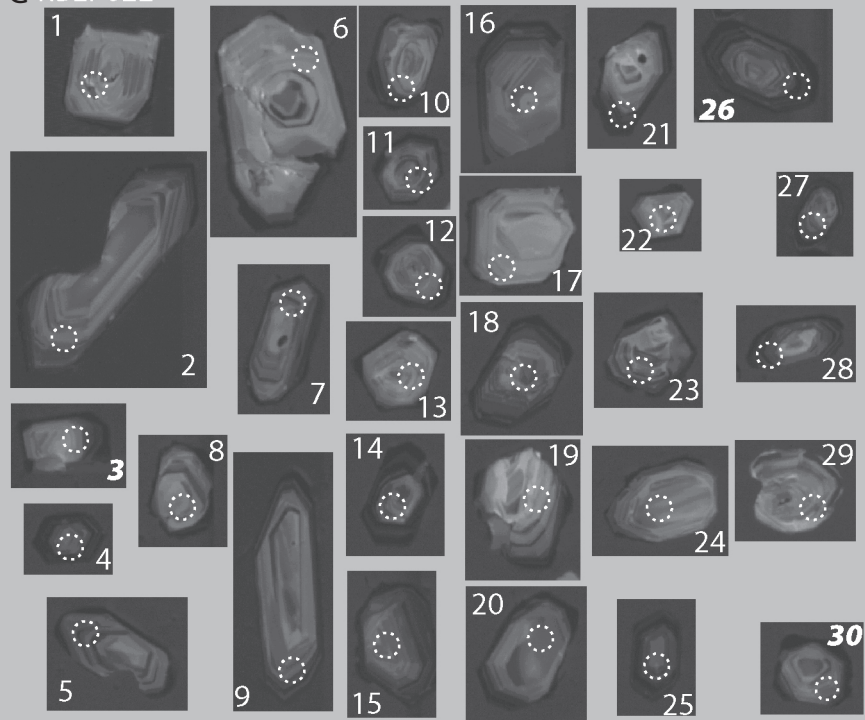

Supplement: Supplementary file 6 [file 22409883]

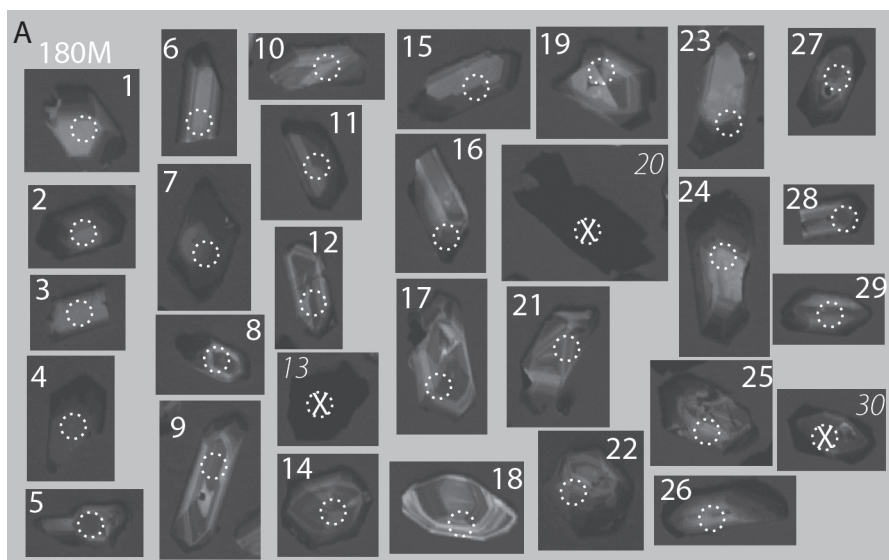

Supplement: Supplementary file 7 [file 22409883]

C 906M

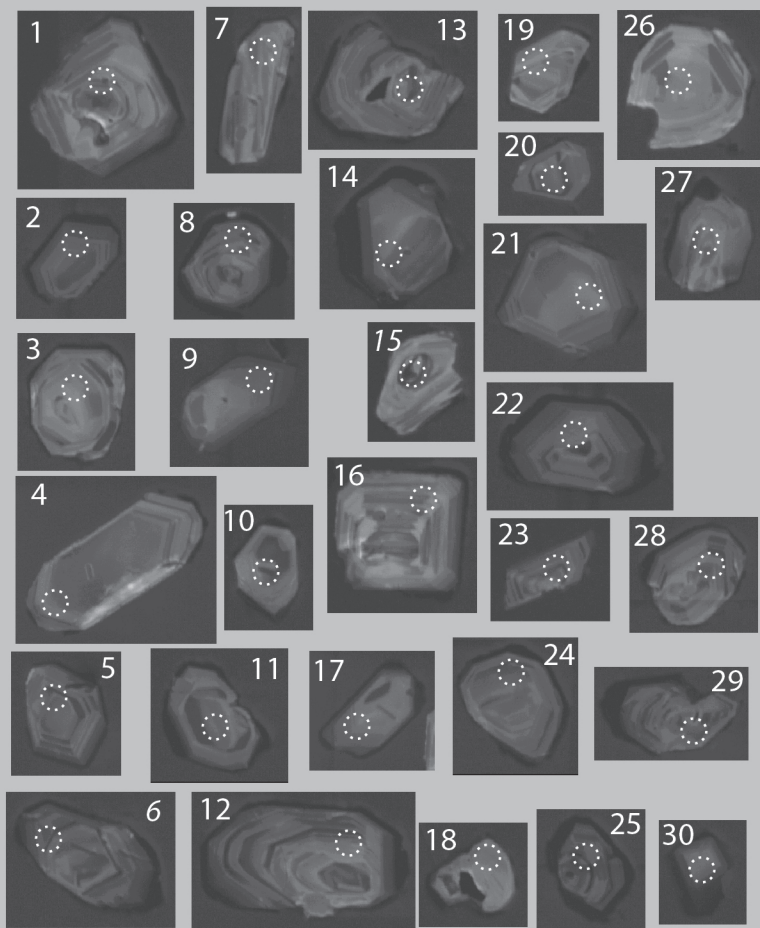

Supplement: Supplementary file 8 [file 22409883]
